# Supplementary material for: Role of Calcium/Calcineurin Signalling in Regulating Intracellular Reactive Oxygen Species Homeostasis in Saccharomyces cerevisiae
Source: MDPI journal article supplement (doi:10.3390/genes12091311), 2021-08-25
Supplement: s1 [file s1]

**Table S1.** Primers used in this study

| Name         | Sequence (5'-3')                                                                |
|--------------|---------------------------------------------------------------------------------|
| YCK1-NGFP-F  | TTTGATTCTGCTTGCTTCTTACAAACAACAAACGCAAACCGTTCATTGA<br>GAATTCGAGCTCGTTTAAAC       |
| YCK1-NGFP-R  | TTGGTGAGGTGTTAACTGCTAGAGTGGTACTTGCTATGGGCATGGACA<br>TTTGTATAGTTCATCCATGC        |
| YCK2-NGFP-F  | ATTGTTTTCTCTTTCGAGATTTAAGAACGTGGTGTGTTTCGTGTTTCT<br>GAATTCGAGCTCGTTTAAAC        |
| YCK2-NGFP-R  | ACAGCTAAACCAGAGTTCGTTGCTGTCAAAGGACTTTGCACTTGAGACATT<br>TTGTATAGTTCATCCATGC      |
| GFP-check-F  | TGGAGAGGGTGAAGGTGATG                                                            |
| YCK1-check-R | CCGGAATTCCTGGTGGTGGAGTTGTTTG                                                    |
| YCK2-check-R | CCGGAATTCAGAGCTATTGCCAGTGTTGTG                                                  |
| AKR1-CGFR-F  | AGCTTTACAAATTGCCAAATAAGGATGTTGAACAAGGAAATGATATGGTA<br>CGGATCCCCGGGTAAATTAA      |
| AKR1-CGFR-R  | CTTCCAGTAATTTCCCAAAACAACATATGTATATTATATATATATGTGC<br>GAATTCGAGCTCGTTTAAAC       |
| ERG3-CGFR-F  | ATGATAATGATAGAATCTATGAAAACGACCCAAATACCAAGAAGAACAAC<br>CGGATCCCCGGGTAAATTAA      |
| ERG3-CGFR-R  | AGCGCATATTGCACTAACGTGAGGTGTACATCATAATGATATGCGTATCT<br>GAATTCGAGCTCGTTTAAAC      |
| AKR1-check-F | ATCAAGGATAGCACCGGAC                                                             |
| AKR1-check-R | ATGATCGTTTTCTCTTACTCGC                                                          |
| ERG3-check-F | TTCTTACCGTAGACCAGATGAC                                                          |
| ERG3-check-R | TGCTTATAGAGTAGTGCGGC                                                            |
| HXT1-NF      | CGTTTTTAATCATTTGAATTAGTATATTGAAATTATATATAAAGGCAACA<br>GAATTCGAGCTCGTTTAAAC      |
| HXT1-NR      | TTGGATGAATTGGATTCTGAGGAGATATTAGATCGGGAGTTGAATTCAT<br>TGTATATGAGATAGTTGATTGTATGC |
| AGP1-NF      | TTTTGTATTTTCCTCGTAATACTCATTGTTTTACATACATATATAAGT<br>GAATTCGAGCTCGTTTAAAC        |
| AGP1-NR      | GAGCTATTTTCAAGTCTTTCAGTTCGTATAGAGACTTCGACGACGACAT<br>TGTATATGAGATAGTTGATTGTATGC |
| HXT1-check-F | AACTTCAATTCATATCGACCGAC                                                         |
| HXT1-check-R | TGAACGACCAGATTCCAATTC                                                           |
| AGP1-check-F | ACGAAGGTGTGCATTCTCCC                                                            |
| AGP1-check-R | GGATGGACGGTCATTGGAG                                                             |
| HXT1-LF      | CCCTCACTAAAGGGAACAAAAGCTGGGTACCACTTCAATTCATATCGACCGAC                           |
| HXT1-LR      | ACGACGGGATCGCAAGCTGGGAATTCTGAACGACCAGATTCCAATTC                                 |
| AGP1-LF      | CCCTCACTAAAGGGAACAAAAGCTGGGTACCGAAGGTGTGCATTCTCCC                               |
| AGP1-LR      | ACGACGGGATCGCAAGCTGGGAATTCGGATGGACGGTCATTGGAG                                   |
| HXT1-RT-F    | TTGGTTGTGCCATTGGTGGTATCGTC                                                      |
| HXT1-RT-R    | TGGAACCTCTCCATTGGACAGAGTTTGAG                                                   |

|           |                             |
|-----------|-----------------------------|
| AGP1-RT-F | ATGTTCTGATGATTGCGTTGGGTACGG |
| AGP1-RT-R | ACCAATTCCAGAGGACACACACAGCC  |
| AKR1-RT-F | TAACGACGGTGACTCTACGG        |
| AKR1-RT-R | TATCTGCGATCTTTATGCTGG       |
| ERG3-RT-F | ACACCTTTCGCATCTCATT         |
| ERG3-RT-R | TTATCATCACCTTCGACCTCC       |
| ACT1-RT-F | CTGAATTAACAATGGATTCTG       |
| ACT1-RT-R | TTCCATATCGTCCCAGTTGG        |

---
